1 **Inverse occlusion, a binocularly motivated treatment for**  
2 **amblyopia**

3 Jiawei Zhou<sup>1\*</sup>, Yidong Wu<sup>1</sup>, Yiya Chen<sup>1</sup>, Xiaoxin Chen<sup>1</sup>, Yunjie Liang<sup>1</sup>, Yu Mao<sup>1</sup>, Zhimo  
4 Yao<sup>1</sup>, Zhifen He<sup>1</sup>, Fan Lu<sup>1</sup>, Jia Qu<sup>1</sup> and Robert F. Hess<sup>2,3\*</sup>

5 <sup>1</sup>School of Ophthalmology and Optometry and Eye hospital, Wenzhou Medical University,  
6 Wenzhou, Zhejiang 325003, PR China,

7 <sup>2</sup>McGill Vision Research, Department of Ophthalmology, McGill University, Montreal,  
8 Quebec, Canada H3G 1A4.

9

10 \* Correspondence should be addressed to: Jiawei Zhou ([zhoujw@mail.eye.ac.cn](mailto:zhoujw@mail.eye.ac.cn)) and  
11 Robert F. Hess ([robert.hess@mcgill.ca](mailto:robert.hess@mcgill.ca))

12

13

14

15

16

17

18

19

20

21

## 22 **Abstract**

23 Recent laboratory finding suggest that short-term patching the amblyopic eye (i.e.,  
24 inverse occlusion) results in a larger and more sustained improvement in the binocular  
25 balance compared with normal controls. In this study, we investigate the cumulative  
26 effects of the short-term inverse occlusion in adults and old children with amblyopia. A  
27 prospective cohort study of 18 amblyopes (10-35 years old; 3 with strabismus) who have  
28 been subjected to 2 hours/day of inverse occlusion for 2 months. Patients who required  
29 refractive correction or whose refractive correction needed updating were given a 2-  
30 month period of refractive adaptation. The primary outcome measure was the binocular  
31 balance which was measured using a phase combination task, the secondary outcome  
32 measures were the best corrected visual acuity which was measured with a Tumbling E  
33 acuity chart and convert to logMAR units and the stereo acuity which was measured with  
34 the Random-dot preschool stereotest. The averaged binocular gain was 0.11 in terms of  
35 the effective contrast ratio ( $z = -2.344$ ,  $p = 0.019$ , 2-tailed Related samples Wilcoxon  
36 Signed Ranks Test). The average acuity gain was 0.14 logMAR equivalent ( $t(17) = 0.13$ ,  
37  $p < 0.001$ , 2-tailed paired samples t-test). The averaged stereo acuity gain was 253 arc  
38 seconds ( $z = -2.689$ ,  $p = 0.007$ ). Based on more recent research concerning adult ocular  
39 dominance plasticity, contrary to current practice, patching the amblyopic eye  
40 makes more sense; comparable acuity benefits, better compliance, better binocular  
41 outcome and applicable to adults as well as old children.

42

43

44

45

## 46 **1. Introduction**

47 Occlusion of the fixing eye has been the gold standard treatment for amblyopia ever since  
48 it was first introduced in 1743 by Conte de Buffon[1]. It has evolved over the years; partial  
49 rather than fulltime occlusion is now preferred and filters (i.e. Bangerter filters)[2], lenses  
50 (i.e. defocus, or frosted) and eye drops (i.e. atropine)[3, 4] have been used instead of  
51 opaque patches. It is effective in over 53% of cases in improving acuity in the amblyopic  
52 eye by more than 2 lines of logMAR acuity[5]. It does however leave something to be  
53 desired in a number of aspects. Compliance can be low[6] because it restricts school  
54 age children to the low vision of their amblyopic eyes for part of the day and also because  
55 of its psychosocial side-effects[7]. There is a relatively poor binocular outcome even  
56 though the acuity of the amblyopic eye is improved[8]. Its effects are age-dependent;  
57 effectiveness is much reduced for children over the age of 10 years old[9, 10]. Finally, it  
58 is associated with a 25% regression rate once the patch has been removed[11, 12]. It is  
59 effective but far from ideal. Interestingly, the basis of this widely accepted therapy is poorly  
60 understood. An explanation is often advanced in terms of “forcing the amblyopic to work”  
61 by occluding the fixing eye, which prompts the question, *what is stopping the amblyopic*  
62 *eye from working under normal binocular viewing?* This suggests that the problem of  
63 improving vision in the amblyopic eye, far from being simply a monocular issue, must  
64 have an underlying binocular basis (i.e., involving the fixing eye). Occlusion of the fixing  
65 eye must be, in some way, disrupting what is normally preventing the amblyopic eye from  
66 working when both eyes are open. Within the clinical literature this is known as

67 suppression and one supposes that occlusion affects suppression in a way that is  
68 beneficial to the acuity of the amblyopic eye.

69

70 Recent laboratory studies have shown that short-term occlusion (i.e., 2 hours) is  
71 associated with temporary changes in eye dominance in normal adults. There are two  
72 things that are particularly novel about this new finding; first, these changes occur in  
73 adults and secondly, the eye that is patched becomes stronger in its contribution to the  
74 binocular sum. In other words, the eye balance is shifted in favour of the previously  
75 patched eye. This was first shown by Lunghi et al (2011)[13] using a binocular rivalry  
76 measure to quantify eye dominance. Since then there has been a wealth of information  
77 on this form of eye dominance plasticity in normal adults using a wide variety of different  
78 approaches[13-25]. Zhou et al (2013)[25] were the first to show that adults with amblyopia  
79 also exhibited this form of plasticity and that it tended to be of larger magnitude and of a  
80 more sustained form. They made the novel suggestion that it could provide the basis of  
81 a new therapeutic avenue for amblyopes in re-establishing the correct balance between  
82 their two eyes. Such a suggestion rests on the assumption that serial episodes of short-  
83 term occlusion can lead to sustainable long-term improvements in eye balance. The  
84 hallmark of this form of plasticity is that, once the patch has been removed, the patched  
85 eye's contribution to binocular vision is strengthened. Zhou et al (2013)[25] suggested  
86 that to redress the binocular imbalance that characterizes amblyopia, it is the amblyopic  
87 eye that would need to be occluded, opposite to what has been in common practise for  
88 hundreds of years to improve the acuity in the amblyopic eye. Such a therapy, in principle,  
89 would be primarily binocular in nature (addressing the binocular imbalance as a first step),

90 it would be expected to have much less compliance problems since it is not affecting the  
91 day to day vision of the patient and since it has been demonstrated in adults, it could be  
92 administered at any age. While this is well and good from a purely binocular perspective,  
93 the obvious question is how would occlusion of the amblyopic eye on a long-term basis  
94 (e.g., 2 hours or more a day for months) affect the acuity of the patched eye? The ethical  
95 basis for such interventions is not in doubt, as there is evidence indicating that such  
96 treatment is likely to be benefit rather than harm the vision of the amblyopic eye (including  
97 children). In the 1960s, so-called inverse occlusion was sometimes used in an attempt to  
98 treat eccentric fixation, which accompanies amblyopia in its more severe form. A review  
99 of these studies[26-30] leads to two conclusions; first, inverse occlusion did not make the  
100 amblyopia worse and second, acuity improved in the amblyopic eye in a percentage of  
101 cases. The percentage of patients whose vision improved was significantly less than that  
102 of classical occlusion in most[26, 29, 30], but not all[27, 28] studies, which could arguably  
103 be a consequence of the fact that studies on inverse occlusion were restricted to the more  
104 severe and resistant forms of amblyopia. Therefore, on the basis of recent laboratory  
105 studies on ocular dominance plasticity resulting from short term monocular occlusion[13-  
106 25] and previous clinical studies, on inverse occlusion designed to treat eccentric  
107 fixation[26-30], we have two expectations; first that inverse occlusion (i.e., occlusion of  
108 the amblyopic eye) should improve the binocular balance in patients with amblyopia and  
109 second, that improved acuity of the amblyopic eye should also be expected. Two  
110 additional benefits of this approach would be the expectation of better compliance, as the  
111 fellow eye is not occluded and its applicability to older children and adults, since ocular  
112 dominance plasticity occurs in adults.

113

114 To determine whether this radical departure from what is in common practice has any  
115 benefit, we studied the effects of inverse occlusion of 2 hours /day for 2 months on a  
116 group of 18 anisometropic and strabismic amblyopic teens and adults (10-35 years old),  
117 an age range where classical occlusion therapy has low compliance[31]. Our primary  
118 outcome measure was the binocular balance or ocular dominance. The second outcome  
119 measures were visual acuity and stereo acuity. The results suggest that this approach  
120 results in modest gains in both binocular balance and visual acuity within this older age  
121 group, no adverse effects were encountered.

122

123

## 124 **2. Materials and Methods**

125 **2.1 Participants:** Eighteen amblyopes with ( $n = 3$ ) or without ( $n = 15$ ) strabismus  
126 participated in our experiment. All of the patients were detected at 10 years or older or  
127 had failed with classical occlusion therapy (i.e., patching the fellow eye). Clinical details  
128 of patients are provided in Table 1. Observers wore their prescribed optical correction, if  
129 needed, in the data collection. Written informed consent was obtained from all patients,  
130 or from the parents or legal guardian of participants aged less than 18 years old, after  
131 explanation of the nature and possible consequences of the study. This study followed  
132 the tenets of the Declaration of Helsinki and was approved by the Ethics Committee of  
133 Wenzhou Medical University.

134 **Table 1. Clinical details of the participants.**

| Subject | Age/<br>Sex | Cycloplegic<br>refractive errors<br>(OD/OS) | Squint<br>(OD/OS) | Balance<br>point<br>(OD/OS) |      | logMAR<br>visual acuity<br>(OD/OS) |           | RDS<br>(arc seconds) |      | History                                                                          |
|---------|-------------|---------------------------------------------|-------------------|-----------------------------|------|------------------------------------|-----------|----------------------|------|----------------------------------------------------------------------------------|
|         |             |                                             |                   | Pre                         | Post | Pre                                | Post      | Pre                  | Post |                                                                                  |
|         |             |                                             |                   | S1                          | 26/F | Plano<br>Plano                     | ∅<br>ET5° | 0.15                 | 0.15 |                                                                                  |
| S2      | 12/M        | + 0.50<br>+ 5.00 + 0.50×80                  | ∅<br>∅            | 0.10                        | 0.91 | -0.18                              | -0.18     | 800                  | 200  | Detected at 10 years old, glasses thereafter, no patching history                |
| S3      | 35/M        | - 5.50 - 0.75×85<br>+ 0.75                  | ∅<br>∅            | 0.15                        | 0.42 | 0.00                               | 0.00      | 800                  | 200  | Detected at 21 years old, glasses thereafter, no patching history                |
| S4      | 21/F        | -1.50<br>+ 3.50                             | ∅<br>∅            | 0.45                        | 0.49 | 0.00                               | 0.00      | 100                  | 40   | Detected at 19 years old, glasses thereafter, no patching history                |
| S5      | 11/F        | + 4.00×95<br>Plano                          | ∅<br>∅            | 0.43                        | 0.52 | 0.22                               | 0.10      | 40                   | 40   | Detected at 11 years old, glasses for 2 months, no patching history              |
| S6      | 23/F        | + 2.25<br>- 2.5 - 1.25×175                  | ∅<br>∅            | 0.33                        | 0.20 | 1.00                               | 0.82      | 800                  | 40   | Detected at 13 years old, glasses since 18 years old, no patching history        |
| S7      | 12/M        | + 7.00<br>Plano                             | ∅<br>∅            | 0.40                        | 0.52 | 1.00                               | 0.82      | 800                  | 800  | Detected at 12 years old, glasses for 2 months, no patching history              |
| S8      | 13/M        | Plano<br>+ 6.00                             | ∅<br>∅            | 0.14                        | 0.40 | 0.00                               | 0.00      | 800                  | 800  | Detected at 12 years old, glasses thereafter, patching occasionally for 2 months |
| S9      | 11/M        | + 4.00<br>Plano                             | ∅<br>∅            | 0.71                        | 0.85 | 0.70                               | 0.52      | 200                  | 40   | Detected at 11 years old, glasses for 2 months, no patching history              |
| S10     | 17/M        | + 3.25<br>Plano                             | ∅<br>∅            | 0.20                        | 0.44 | 0.60                               | 0.60      | 800                  | 60   | Detected at 17 years old, glasses for 2 months, no patching history              |
| S11     | 11/M        | + 6.00<br>-0.75                             | ∅<br>∅            | 0.14                        | 0.25 | 1.40                               | 0.92      | 800                  | 800  | Detected at 11 years old, glasses for 2 months, no patching history              |
| S12     | 20/F        | Plano<br>+ 5.00                             | ∅<br>∅            | 0.43                        | 0.42 | 0.00                               | 0.00      | 40                   | 340  | Detected at 20 years old, glasses for 2 months, no patching history              |
| S13     | 13/M        | -0.50<br>+ 5.00 + 1.25×5                    | ∅<br>∅            | 0.10                        | 0.13 | -0.08                              | -0.08     | 800                  | 800  | Detected at 13 years old, glasses for 2 months, no patching history              |
| S14     | 10/F        | Plano<br>Plano                              | ET15°<br>∅        | 0.19                        | 0.18 | -0.08                              | -0.08     | 800                  | 800  | Detected at 14 years old, no patching history, no surgery                        |
| S15     | 29/F        | + 2.50 +<br>1.00×100<br>+ 1.50 + 1.00×90    | ∅<br>∅            | 0.04                        | 0.04 | 0.60                               | 0.60      | 800                  | 200  | Detected at 7 years old, glasses thereafter, patching occasionally for 1 year    |
| S16     | 13/M        | + 4.50<br>Plano                             | ∅<br>∅            | 0.46                        | 0.48 | 0.70                               | 0.60      | 800                  | 60   | Detected at 12 years old, glass thereafter, patching occasionally for 2 months   |
| S17     | 11/M        | Plano                                       | ∅                 | 0.18                        | 0.21 | 0.00                               | 0.00      | 800                  | 200  |                                                                                  |

|     |                                                                                                                                                                                        |                      |   |      |      |      |      |     |     |                                                                           |
|-----|----------------------------------------------------------------------------------------------------------------------------------------------------------------------------------------|----------------------|---|------|------|------|------|-----|-----|---------------------------------------------------------------------------|
|     |                                                                                                                                                                                        | + 3.50 +<br>1.00×100 | ∅ |      |      | 0.82 | 0.70 |     |     | Detected at 11 years old,<br>glasses for 2 months, no<br>patching history |
| S18 | 19/F                                                                                                                                                                                   | -5.00                | ∅ | 0.82 | 0.72 | 0.00 | 0.00 | 800 | 800 | Detected at 19 years old,<br>glasses for 2 months, no<br>patching history |
| 135 |                                                                                                                                                                                        | + 2.00               | ∅ |      |      | 0.40 | 0.30 |     |     |                                                                           |
| 136 | F, Female; M, Male; OD, Oculus dexter (right eye); OS, Oculus sinister (left eye); DS, Dioptres sphere; DC, Dioptres<br>cylinder; ET, Heterotropia Esodeviation at far distance (6 m). |                      |   |      |      |      |      |     |     |                                                                           |
| 137 |                                                                                                                                                                                        |                      |   |      |      |      |      |     |     |                                                                           |

138 **2.2 Apparatus:** The measures of binocular balance were conducted on a PC computer  
139 running Matlab (MathWorks, Inc., Natick, MA) with PsychToolBox 3.0.9 extensions[32,  
140 33]. The stimuli were presented on a gamma-corrected LG D2342PY 3D LED screen (LG  
141 Life Science, Korea) with a 1920 × 1080 resolution and a 60 Hz refresh rate. Subjects  
142 viewed the display dichoptically with polarized glasses in a dark room at a viewing  
143 distance of 136 cm. The background luminance was 46.2 cd/m<sup>2</sup> on the screen and 18.8  
144 cd/m<sup>2</sup> through the polarized glasses. A chin-forehead rest was used to minimize head  
145 movements during the experiment.

146 The measure of best-corrected visual acuity was using a Tumbling E acuity chart, the  
147 Chinese national standard logarithmic vision chart (Wenzhou Xingkang, Wenzhou,  
148 China), at 5 meters. This consists of E letters in 4 orientations on each line in a logarithmic  
149 progression from 20/200 to 20/10. The measure of stereo acuity was using the Random-  
150 dot preschool stereograms (RDS test; Baoshijia, Zhengzhou, China) at 40 cm.  
151 Strabismus angle was measured using the prism cover test.

152

153 **2.3 Design:** Patients' binocular balance (balance point in the binocular phase  
154 combination task), visual acuity and stereo acuity were measured before and after two



155 months of occlusion of the amblyopic eye for 2 hours/day (i.e., the inverse occlusion). For  
156 patients who required refractive correction or whose refractive correction needed  
157 updating (n = 9), a 2-month period of refractive adaptation was provided prior to the  
158 inverse occlusion study (Figure 1).

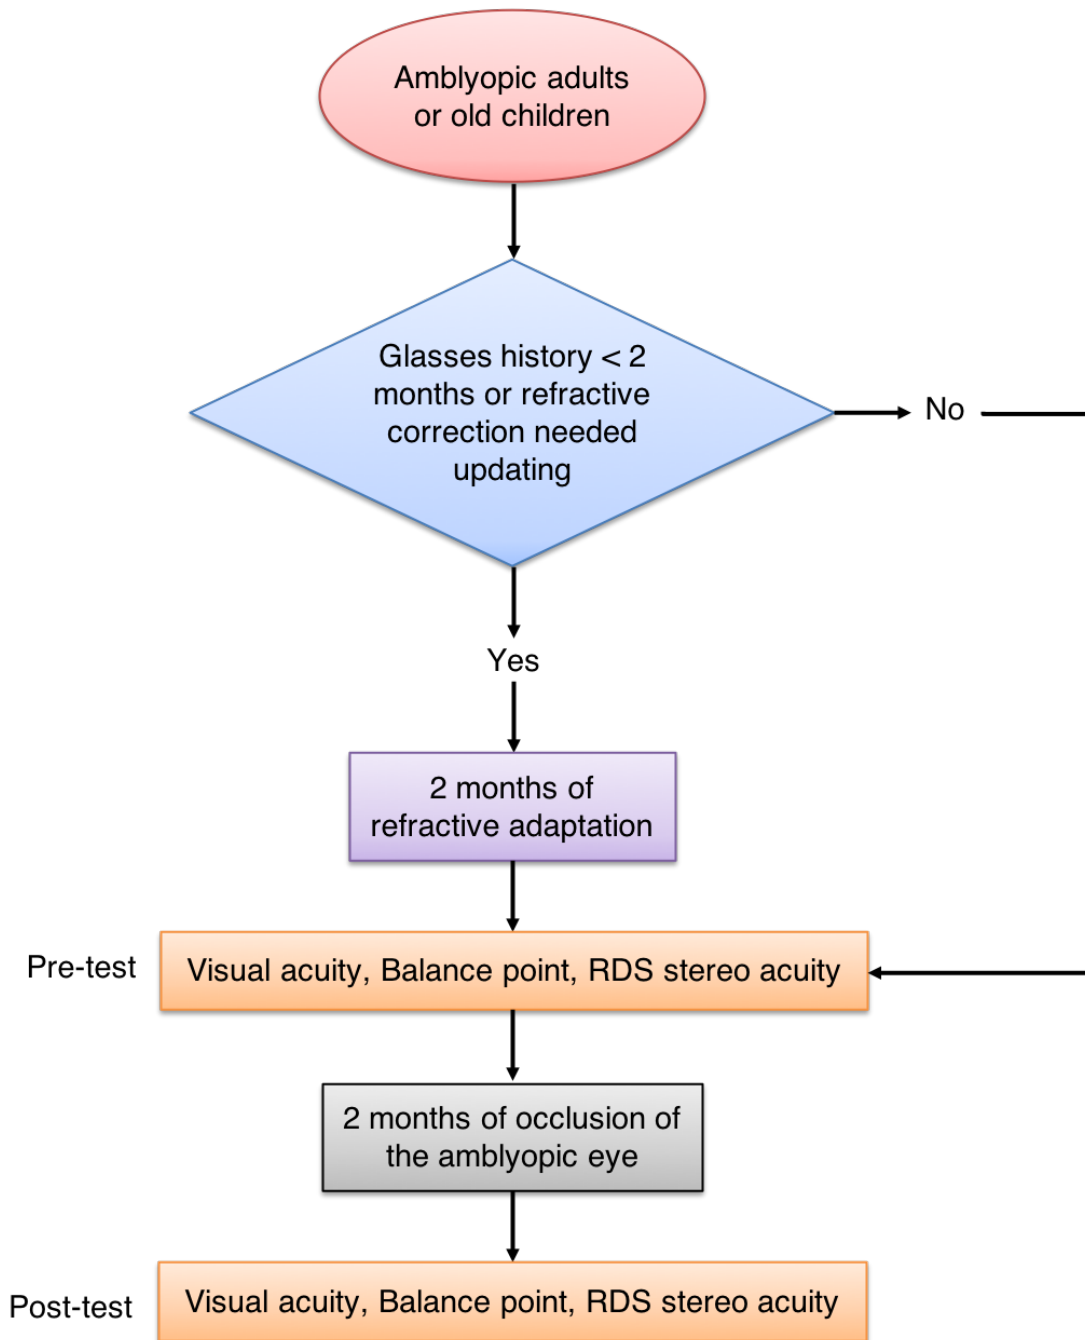

159

160 **Figure 1. Experimental design.**

161 Eighteen amblyopes with (n = 3) or without (n = 15) strabismus participated in our experiment. Patients'  
162 binocular balance (balance point in the binocular phase combination task), visual acuity and stereo  
163 acuity were measured before and after two months of occlusion of the amblyopic eye for 2 hours/day  
164 (i.e., the inverse occlusion). For patients who required refractive correction or whose refractive  
165 correction needed updating (n = 9), a 2-month period of refractive adaptation was provided prior to the  
166 inverse occlusion study.

167

168

169 Since this approach is different from that currently used (i.e., classical occlusion therapy),  
170 we were careful to conduct follow-up evaluations in accordance with the regulations from  
171 the Amblyopia Preferred Practice Pattern® guideline (“PPP” 2017), P124: “If the visual  
172 acuity in the amblyopic eye is improved and the fellow eye is stable, the same treatment  
173 regimen should be continued”. In particular, we conducted weekly visits in the pilot study  
174 (in S1 to S13), rather than the 2 to 3 months that “PPP” recommends (P124 in “PPP”: “In  
175 general, a follow-up examination should be arranged 2 to 3 months after initiation of  
176 treatment”) to ensure that the acuity in the amblyopic eye did not deteriorate as a result  
177 of patching (Figure 2).

178

179 We quantitatively assessed the binocular balance using a binocular phase combination  
180 paradigm[34, 35], which measures the contributions that each eye makes to binocular  
181 vision. The design was similar as the one we used in previous studies[36, 37], in which

182 observers were asked to dichoptically view two horizontal sine-wave gratings having  
183 equal and opposite phase-shifts of  $22.5^\circ$  (relative to the center of the screen) through  
184 polarized glasses; the perceived phase of the grating in the cyclopean percept was  
185 measured as a function of the interocular contrast ratio. By this method, we were able to  
186 find a specific interocular contrast ratio where the perceived phase of the cyclopean  
187 grating was 0 degrees, indicating equal weight to each eye's image. This specific  
188 interocular contrast ratio reflects the "balance point" for binocular phase combination  
189 since the two eyes under these stimulus conditions contribute equally to binocular vision.  
190 For each interocular contrast ratio ( $\delta = [0, 0.1, 0.2, 0.4, 0.8, 1.0]$ ), two configurations were  
191 used in the measurement so that any starting potential positional bias will be cancelled  
192 out: in one configuration, the phase-shift was  $+22.5^\circ$  in the nondominant eye and  $-22.5^\circ$   
193 in the dominant eye and in the other, the reverse. The perceived phase of the cyclopean  
194 grating at each interocular contrast ratio ( $\delta$ ) was quantified by half of the difference  
195 between the measured perceived phases in these two configurations. Different conditions  
196 (configurations and interocular contrast ratios) were randomized in different trials, thus  
197 adaptation or expectation of the perceived phase would not have affected our results. The  
198 perceived phase and its standard error were calculated based on eight measurement  
199 repetitions. Before the start of data collection, proper demonstrations of the task were  
200 provided by practice trials to ensure observers understood the task. During the test,  
201 observers were allowed to take short-term breaks whenever they felt tired.

202

203 **2.4 Stimuli:** In the binocular phase combination measure, the gratings in the two eyes  
204 were defined as:

205 
$$Lum_{nonDE}(y) = L_0 \left[ 1 - C_0 \cos \left( 2\pi f y \pm \frac{\theta}{2} \right) \right] \quad (1)$$

206 
$$Lum_{DE}(y) = L_0 \left[ 1 - \delta C_0 \cos \left( 2\pi f y \mp \frac{\theta}{2} \right) \right] \quad (2)$$

207 Where  $L_0$  is the background luminance;  $C_0$  is the base contrast in the nondominant eye;  
208  $f$  is the spatial frequency of the gratings,  $\delta$  is the interocular contrast ratio and  $\theta$  is the  
209 interocular phase difference.

210 In our test,  $L_0 = 46.2 \text{ cd/m}^2$  (on the screen);  $C_0 = 96\%$ ;  $f = 1 \text{ cycle/}^\circ$ ;  $\delta = [0, 0.1, 0.2, 0.4,$   
211  $0.8, 1.0]$  and  $\theta = 45^\circ$ .

212 Surrounding the gratings, a high-contrast frame (width,  $0.11^\circ$ ; length,  $6^\circ$ ) with four white  
213 diagonal lines (width,  $0.11^\circ$ ; length,  $2.83^\circ$ ) was always presented during the test to help  
214 observers maintain fusion.

215

216 **2.5 Procedure:** We used the same phase adjustment procedure as used by Huang et  
217 al[35] for measuring the perceived phase of the binocularly combined grating. In each  
218 trial, observers were asked firstly to align the stimuli from the two eyes; they were then  
219 instructed to adjust the position of a reference line to indicate the perceived phase of the  
220 binocularly combined grating. Since the gratings had a period of 2 cycles corresponding  
221 to 180 pixels, the phase adjustment had a step size of 4 degrees of phase / pixel (2 cycles  
222  $\times 360 \text{ phase-degree / cycle / 180 pixels}$ ).

223

224 **2.6 Statistical analysis:** Data are presented as mean  $\pm$  S.E.M unless otherwise indicated.  
225 Sample number (n) indicates the number of observers in each group, which are indicated  
226 in the figure. A one-Sample Kolmogorov-Smirnov Test was performed on each dataset to  
227 evaluate normality. A 2-tailed Related samples Wilcoxon Signed Ranks Test was used  
228 for comparison between nonnormally distributed datasets; A 2-tailed paired samples t-  
229 test was used for comparison between normally distributed datasets; A within subject  
230 repeated-measure ANOVA was used to evaluate the time effect of the inverse occlusion.  
231 Differences in means were considered statistically significant at  $p < 0.05$ . Analyses were  
232 performed using the SPSS 23.0 software.

233

234

### 235 **3. Results**

236 In the pilot study, we firstly conducted a 0.5-month of inverse occlusion (2 hours/day) in  
237 S1 to S13. We found that amblyopic eye's visual acuity improvement in 5 of the 13  
238 patients after 2 weeks of treatment, with no cases of acuity loss in the amblyopic eye.  
239 Visual acuity of the fellow eye was stable in all cases. We then extend the occlusion  
240 period to 1 month and 9 of 13 patients were found to exhibit small gains in visual acuity.  
241 No cases were recorded where the acuity of the amblyopic eye deteriorated. The Visual  
242 acuity of the fellow eye remained stable in all cases. We then extended the occlusion  
243 period to 2 months, and found that 11 of 13 patients showed small improvements in visual  
244 acuity in the amblyopic eye at that time. No patients exhibited a deterioration of function  
245 in the amblyopic eye and the visual acuity of the fellow eye remained stable (Figure 2). A

246 within subject repeated-measure ANOVA verified that the amblyopic eye's visual acuity  
247 was significantly different at these different follow-up sessions:  $F(3, 36) = 8.54$ ,  $p < 0.001$ .  
248 This result clearly shows a dose-response relationship for the amblyopic eye in terms of  
249 visual acuity.

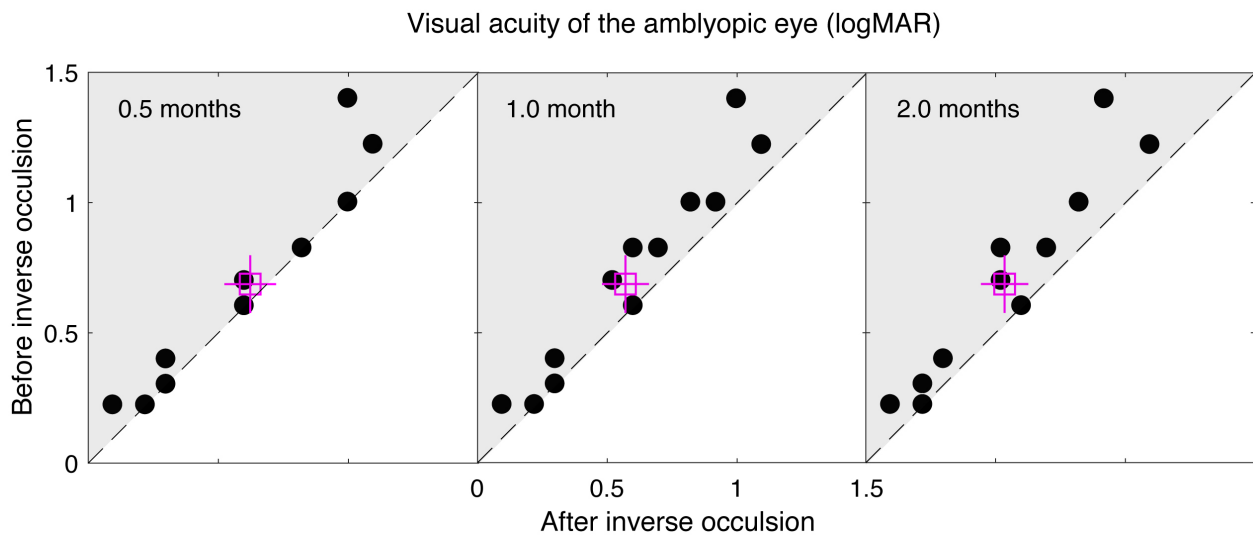

251 **Figure 2. The change of amblyopic eye's visual acuity after inverse occlusion.**

252 S1 to S13 participated in this pilot study. In each panel, each dot represents one patient. The open  
253 square represents the averaged results. Error bars represent standard errors. Data falling in the  
254 shaded area represents improvements; data falling on the sloping line represent no effect. Amblyopic  
255 eye's visual acuity improved in 5 of the 13 patients after 2 weeks of treatment; in 9 of the 13 patients  
256 after 1 month of treatment; and in 11 of the 13 patients after 2 months of treatment. Fellow eye's visual  
257 acuity was stable in all patients. No case of a deterioration of acuity in the amblyopic eye was recorded.  
258 The amblyopic eye's visual acuity was significantly different at different follow-up sessions:  $F(3, 36) =$   
259  $8.54$ ,  $p < 0.001$ , 2-tailed within subject repeated-measure ANOVA.

260

261 Since we could not have a control group who were denied any treatment, there is always  
262 the possibility that improvements in visual acuity measured at different time points are  
263 simply due to learning effects. To test this, we recorded the stability of acuity measured  
264 for the untreated fellow eye, as a similar learning effect should apply. In Figure 3, we plot  
265 the visual acuity gain as a function of treatment duration for the patched amblyopic eye  
266 and the unpatched fellow eye. There is an obvious difference between the two curves. A  
267 within-subject repeated-measure ANOVA, with eye and follow-up sessions as within-  
268 subject factors, verified that the visual acuity gain was significantly different between eyes  
269 ( $F(1,12) = 11.05, p = 0.006$ ) and follow-up sessions ( $F(2,24) = 9.76, p = 0.001$ ). The  
270 interaction between these 2 factors was also significant:  $F(2, 24) = 7.27, p = 0.003$ ,  
271 indicating that the visual acuity gain of the amblyopic eye could not be accounted for by  
272 repeated testing alone.

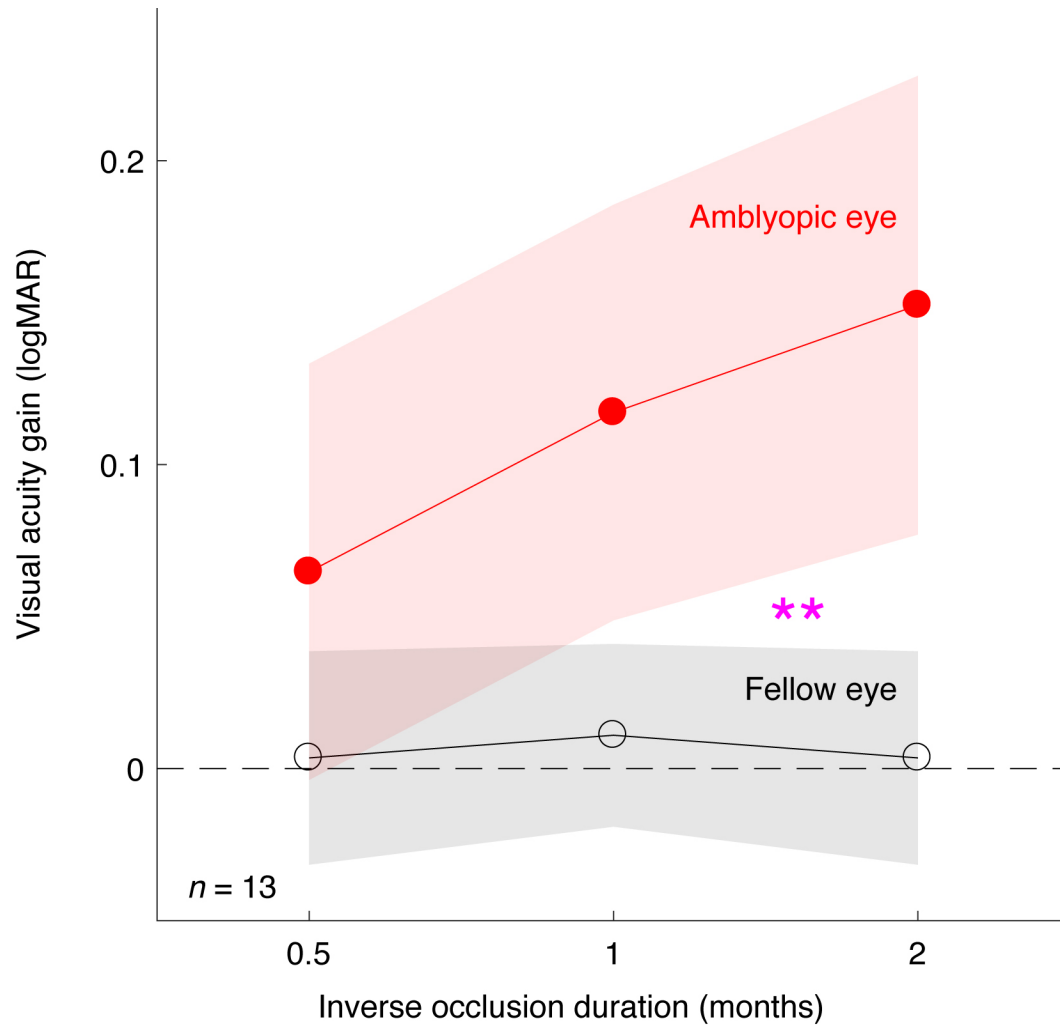

273

274 **Figure 3. A dose-response relationship for the amblyopic eye.**

275 Averaged visual acuity gains of the amblyopic eye (filled circles) and the fellow eye (open circles) were  
276 plotted as a function of the inverse occlusion durations. The areas indicate the 95% confidence interval  
277 for mean. The two curves were significantly different (\*\*): the interaction between eye and inverse  
278 occlusion duration was significant:  $F(2, 24) = 7.27$ ,  $p = 0.003$ ; 2-tailed repeated-measure ANOVA.

279

280



281 Once we had shown that inverse occlusion can be undertaken in a safe fashion, we added  
282 5 additional patients (S14 to S18) to the original study cohort of 13 (S1 to S13). These  
283 additional patients followed the same protocol as the original thirteen (S1 to S13), but  
284 visual functions were only measured before and after 2 months of treatment. A summary  
285 of the main result for all the 18 patients is shown in Figure 4 for the measures of ocular  
286 balance, visual acuity and stereo acuity. Measurements before and after 2-month of  
287 treatment are plotted against one another. In term of ocular balance, the measure used  
288 is the interocular contrast that is required to achieve a binocular balance. By binocular  
289 balance we mean that the contributions of each eye's input are equal at the site of  
290 binocular combination. For normals with equal eye balance, the effective contrast ratio  
291 would be unity. Values below unity indicate a shift in ocular dominance towards the fixing  
292 eye. Data falling on the sloping diagonal line represents no change from treatment  
293 whereas data falling in the shaded regions represents an improvement in binocular  
294 function (Figure 4A).

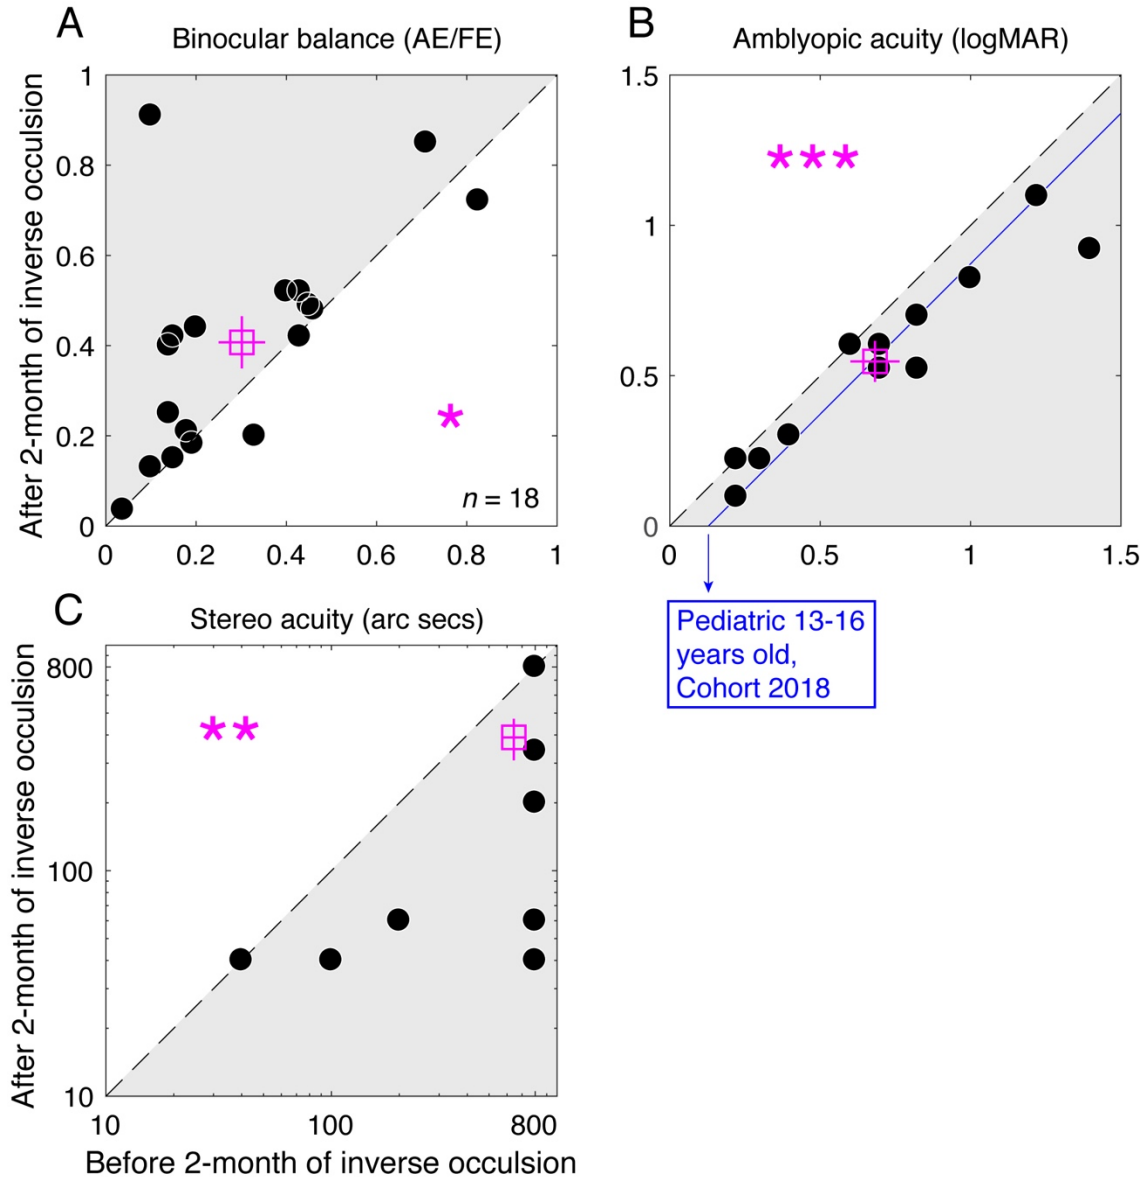

295

296 **Figure 4. Visual outcomes after two months of occlusion of the amblyopic eye for 2**  
297 **hours/day.**

298 Eighteen amblyopes (S1 to S18; 10 to 35 years old), with (n=3) or without (n=15) strabismus,  
299 participated. For patients who required refractive correction or whose refractive correction needed  
300 updating (n = 9), a 2-month period of refractive adaptation was provided before the inverse occlusion.

301 A. Binocular balance was measured with the binocular phase combination task and expressed as the  
302 interocular contrast ratio (amblyopic eye / fellow eye) when the two eyes are balanced. The binocular

303 balance increased from  $0.30 \pm 0.052$  (Mean  $\pm$  S.E.M.) to  $0.41 \pm 0.058$ . '\*\*':  $z = -2.344$ ,  $p = 0.019$ , 2-  
304 tailed Related samples Wilcoxon Signed Ranks Test. Error bars represent standard errors. Data falling  
305 in the shaded area indicate patients whose two eyes were more balanced; data falling on the sloping  
306 line represent no change.

307 B. Visual acuity was measured with a Tumbling E acuity chart in logMAR units. The visual acuity  
308 improved from  $0.70 \pm 0.085$  (Mean  $\pm$  S.E.M.) to  $0.56 \pm 0.070$ . '\*\*\*':  $t(17)=0.13$ ,  $p < 0.001$ , 2-tailed  
309 paired samples t-test. Error bars represent standard errors. Data falling in the shaded area represents  
310 better visual acuity; data falling on the sloping line represent no change. The blue line indicates a 0.13  
311 logMAR visual acuity improvement observed from a recent cohort study from the PEDIG group based  
312 on 2 hours daily of classical patching treatment for 16 weeks in children aged 13 to 16 years with  
313 amblyopia[38].

314 C. Stereo acuity was measured with the Random-dot stereograms. Stereo acuity of 800 arc secs was  
315 assigned for patients (14/18) whose stereo acuity was too high to be measured. The stereo acuity  
316 improved from  $643.3 \pm 71.48$  (Mean  $\pm$  S.E.M.) to  $390 \pm 81.48$ . '\*\*':  $z = -2.689$ ,  $p = 0.007$ , 2-tailed  
317 Related samples Wilcoxon Signed Ranks Test. Error bars represent standard errors. Data falling in  
318 the shaded area represents better stereopsis; data falling on the sloping line represent no change.

319

320 Amblyopes exhibit a range of binocular balances ranging from less than 0.04 to 0.82  
321 (Figure 4A). Inverse patching of 2 hours/day for 2 months improves some more than  
322 others. Six subjects showed no improvement, the other patients showed varying levels of  
323 improvement, meaning that their amblyopic eye was contributing more to binocular vision.  
324 Overall, the averaged improvement was a 0.11 change ( $0.30 \pm 0.052$  (Mean  $\pm$  S.E.M.) to  
325  $0.41 \pm 0.058$ ) in the effective contrast ratio (Square symbol), which was significant based  
326 a 2-tailed Related samples Wilcoxon Signed Ranks Test:  $z = -2.344$ ,  $p = 0.019$ . Our  
327 patients exhibited a range of acuity deficits ranging from less than 0.22 to close to 1.40

328 logMAR (Figure 4B). As expected, the acuity improvements were of varying degrees.  
329 Three patients showed no improvement at all, while all the other patients did exhibit  
330 improvements to varying degrees (shaded area). The averaged improvement (solid  
331 symbol) was 0.14 logMAR (from  $0.70 \pm 0.085$  to  $0.56 \pm 0.070$ ), which was significant  
332 based on a 2-tailed paired samples t-test:  $t(17)=0.13$ ,  $p < 0.001$ .. This magnitude of acuity  
333 gain is similar to the results of a recent PEDIG study using classical occlusion of the same  
334 duration (i.e. 2 hours/day for 16 weeks) in patients of a similar age range[38]. The  
335 averaged stereo acuity gain was 253 arc seconds ( $z = -2.689$ ,  $p = 0.007$ , 2-tailed Related  
336 samples Wilcoxon Signed Ranks Test). This is a very conservative estimate because  
337 14/18 patients had stereo acuities outside of our measurement range and were  
338 conservatively scored at 800 arc secs, the largest disparity tested. This means that the  
339 true stereo acuity gain could be larger than 253 arc seconds.

340

341 These changes in binocular balance, visual acuity and stereo acuity are modest but still  
342 impressive considering the fact that the period of occlusion was relatively short (2 hours),  
343 the duration of the treatment limited to 2 months and it involved an older age group. One  
344 interesting finding is that the improvements in balance and visual acuity are not  
345 significantly correlated ( $p = 0.76$ , Spearman's correlation), so it is unlikely they have a  
346 common basis.

347

348 These improvements are long lasting as we have followed four patients (S12, S14, S16  
349 and S17) for 1 month and one (S9) for 5.5 months after finishing the 2-month of reverse  
350 occlusion regime, which showed that the outcomes were sustained (Figure 5).

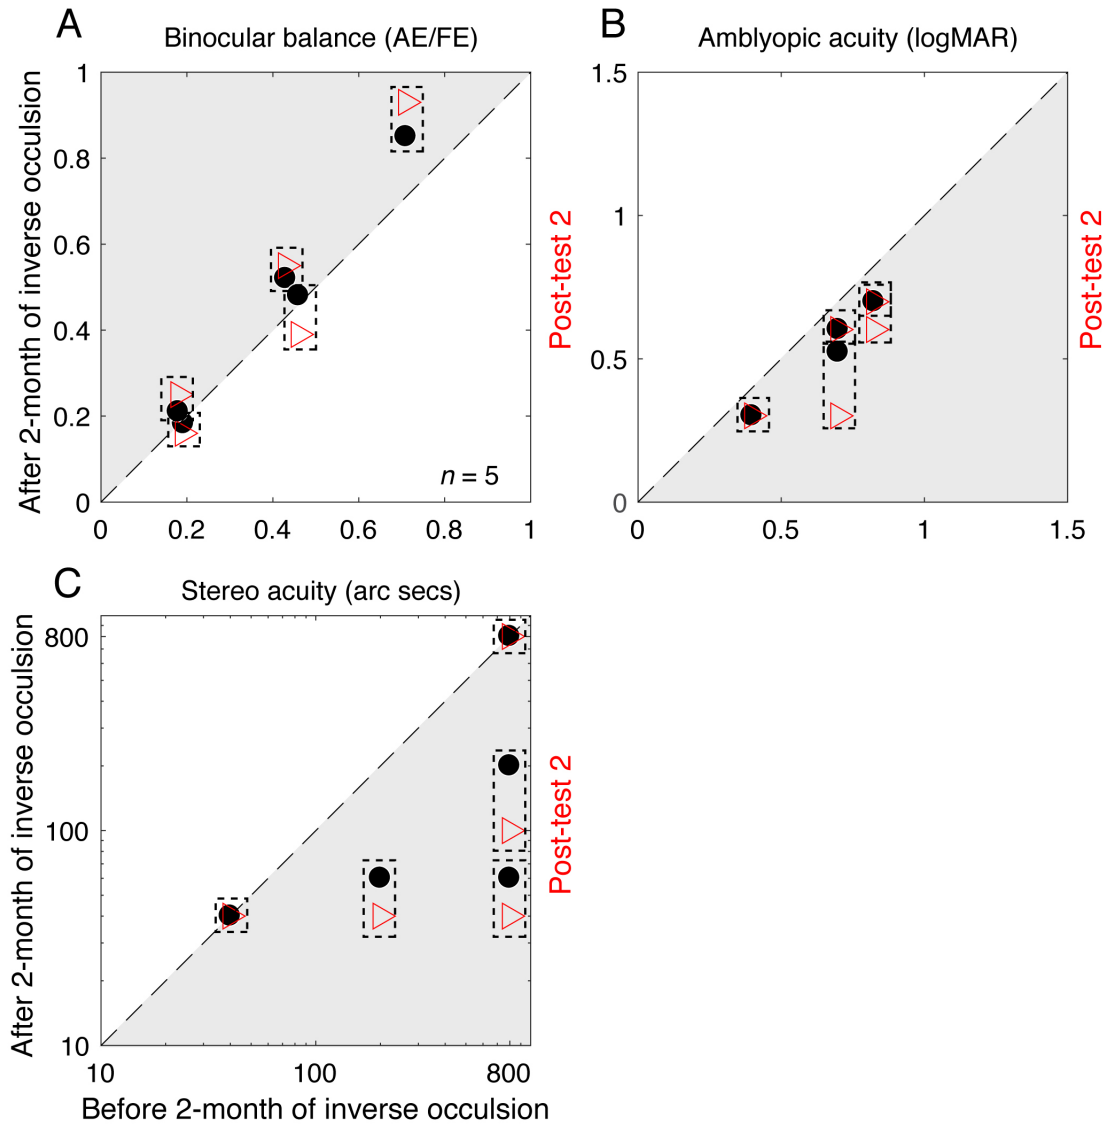

351

352 **Figure 5. The visual outcomes could be sustained after finishing the 2-month of inverse**  
353 **occlusion.**

354 Four patients (S12, S14, S16 and S17) were re-measured at 1 month and one (S9) at 5.5 months after  
355 the completion of the 2-month of reverse occlusion regime. Their results that were measured  
356 immediately after the 2-month of inverse occlusion are marked as black dots; their results that were  
357 measured later are marked as red triangles. The corresponding results for each patient are marked  
358 using the dashed rectangle.

359

360 In our study, patients' age ranged from 10 years old to 35 years old. Interestingly, all  
361 patients who were younger than 14 years old had visual acuity gain. However, for patients  
362 older than 14 years old, only 62.5% of them had a visual acuity gain. A Spearman  
363 correlation analysis showed that there was a positive correlation between the  
364 improvement in visual acuity of the amblyopic eye and the patients' age, i.e., the younger  
365 the patients the more the visual acuity gain ( $Rho = 0.534$ ,  $p = 0.022$ ). The correlations  
366 between patients' age and the binocular balance gain or the RDS stereo acuity gain were  
367 not significant ( $p > 0.3$ ).

368

369 The refractive correction needed updating in half of the patients ( $n = 9$ ), and a 2-month  
370 period of refractive adaptation was provided before inverse occlusion was commenced.  
371 Even though the acuity gains from optical treatments have been shown to be modest after  
372 5-6 weeks of refractive adaptation[39], since those observations were in a much younger  
373 age group, there could still be an argument that our findings were due to the refractive  
374 correction *per se occurring after our 8-week period*, rather than the inverse occlusion. To  
375 assess this, we divided our patients into two subgroups, i.e., those who required refractive  
376 adaptation ( $n = 9$ ) and those who did not ( $n = 9$ ). We found no significantly different of  
377 visual outcomes in these two subgroups, in terms of the improvement of the amblyopic  
378 eye's visual acuity ( $Z = -0.72$ ,  $p = 0.49$ ), binocular balance ( $Z = -0.13$ ,  $p = 0.93$ ) and stereo  
379 acuity ( $Z = -1.80$ ,  $p = 0.09$ ). Thus, there is no basis for believing that the gains were show  
380 here as the result of inverse occlusion where significantly impacted by refractive

381 adaptation gains in visual acuity occurring beyond our 8-week refractive adaptation  
382 period.

383

## 384 **4. Discussion**

385 The rationale for this study comes from the recent findings on ocular dominance plasticity  
386 in normal and amblyopic adults[13-25], the finding that short term patching results in a  
387 strengthening of the contribution of the previously patched eye to binocular vision. This  
388 study, which applies this to amblyopia, raises three interesting issues that are relevant to  
389 the treatment of amblyopia. First, it highlights just how poor our understanding of the basis  
390 of classical occlusion therapy is. How is it that acuity improves in the amblyopia regardless  
391 of which eye is occluded? This does not just come from this study; there is a literature on  
392 the acuity improvements that occur as a result of inverse occlusion. While in most cases  
393 these improvements are much less than that of classical occlusion, there are studies[27,  
394 28], where it is comparable to that of classical occlusion. The standard explanation of  
395 occluding the fixing eye to “forcing the amblyopic eye to work” is untenable. What is  
396 preventing the brain using information from the amblyopic eye under normal viewing  
397 conditions? Whatever it is, occlusion must be preventing (i.e., disinhibiting) it from  
398 operating. The problem must be essentially binocular in nature, which is why it is not  
399 critically dependent on which eye is occluded to disrupt the anomalous interaction. We  
400 would normally think about this anomalous binocular interaction as a suppression of the  
401 amblyopic eye by the fellow eye, but on the basis of the occlusion of either eye being  
402 effective, it may be better to think of suppression as simply a reflection of a binocular  
403 imbalance. Recent psychophysics [40] and animal neurophysiology[41] suggest that the

404 problem is not because the inhibition from the fixing to the amblyopic eye is greater but  
405 because the matching inhibition from the amblyopic eye is less. It is due to a net  
406 imbalance in interocular inhibition. The resulting net imbalance can be disrupted by  
407 occluding either eye and it's the duration of relief from this imbalanced binocular inhibition  
408 that may result in an acuity benefit for the amblyopic eye.

409

410 Ocular dominance plasticity in normals is an all-or-none, homeostatic process and would  
411 not be expected to have accumulated effects over time[42]. In amblyopes, ocular  
412 dominance plasticity has different dynamics, being much more sustained[25]. The present  
413 results suggest also that it can exhibit accumulated effects in amblyopes that result in  
414 long lasting changes in eye balance. These sustained changes are however modest in  
415 size and it will be necessary to explore how the magnitude of this effect can be increased  
416 for it to have significant binocular benefits. Future directions could involve RCT studies  
417 with large number of patients and longer durations of occlusion, potentially with  
418 pharmacological enhancement using dopaminergic[43], serotonergic[44] or cholinergic  
419 modulations[45] or the combination of binocular training procedures[46-50] and short  
420 periods of inverse occlusion.

421

422 The finding that the binocular balance and the monocular acuity improvements from  
423 inverse patching are not correlated suggests that a simple explanation in terms of reduced  
424 suppression is not viable. The two visual improvements are likely to have separate causes  
425 and possibly involving different sites in the pathway. The acuity improvement for the  
426 amblyopic eye is not dependent on which eye is occluded, as shown here (Figure 4B),



427 but the direction of the binocular balance change is dependent on which eye is  
428 occluded[13, 25]. This distinction between binocular balance and monocular visual acuity  
429 is an important one and should be incorporated into future clinical treatment studies.  
430 Finally, apart from the additional benefit of a better binocular balance, its applicability to  
431 older children and adults should not be underestimated, nor should the better compliance  
432 that should follow from the patching of the amblyopic rather than the fixing eye.  
433 Application to younger children would necessitate weekly visits to ensure that the acuity  
434 in the amblyopic eye did not deteriorate as a result of patching.

435

#### 436 **4.1 Relevance of a recently published study**

437 During the writing up of this paper, another study was posted on bioRxiv that is highly  
438 relevant and supportive of the present approach (Lunghi et al (2018); doi:  
439 <https://doi.org/10.1101/360420>). Lunghi et al (2018) undertook a comparable inverse  
440 occlusion study in adults based on the similar notion that patching of an eye can improve  
441 its contrast gain subsequently, a result that they originally showed in normal humans[13]  
442 and we originally demonstrated in humans with amblyopia[25]. However, Lunghi et al  
443 (2018) incorporated physical exercise as well as inverse occlusion and argue, based on  
444 a non-exercise control, that the combination of these two factors results in larger  
445 improvements when treating amblyopia. This in turn was based on their previous finding  
446 that exercise can enhance plasticity in normal adults ([18], but also see [23]). This  
447 published study and the current one both suggest that inverse occlusion can provide long  
448 term benefits in visual acuity, stereopsis and sensory balance. Lunghi et al find that six

449 2-hour sessions of inverse occlusion ( $n = 10$ ) combined with exercise results in a visual  
450 acuity improvement of  $0.15 \pm 0.02$  logMAR, whereas in our initial experiment of 13  
451 patients (S1 to S13), we find a comparable improvement ( $0.15 \pm 0.03$  logMAR) after 2  
452 months of 2hrs a day patching. The shortest treatment duration that we used involved 14  
453 days of 2 hrs/day inverse occlusion and the acuity improvement was  $0.06 \pm 0.03$  logMAR,  
454 similar to that found by Lunghi et al for their non-exercise control ( $0.06 \pm 0.01$  logMAR).  
455 The exercise enhanced protocol seems to be beneficial over the short treatment duration  
456 tested (i.e., 6 x 2 hrs periods). It will be interesting for future studies to compare the  
457 duration-response curves for inverse occlusion with and without exercise to know if they  
458 are parallel or whether they converse at longer treatment durations.

459

#### 460 **4.2 Shortcoming of the present study**

461 These are pilot results, which we hope will help power larger RCTs on the potential  
462 benefits of inverse occlusion. The acuity results are modest and while they are  
463 comparable to those found for classical patching for the same short treatment  
464 duration[38], it would need to be shown that longer treatment durations result in at least  
465 the same extra benefits that has been shown for classical occlusion[51]. The binocular  
466 balance changes, while in the right direction are quite modest in magnitude and it would  
467 need to be shown that longer treatment durations would result in stronger accumulated  
468 effects. If this can be shown, inverse occlusion would carry an additional binocular benefit  
469 over that of classical occlusion. Finally, no adverse effects were found from this relatively

470 short treatment duration in this older age group, future studies would need to assess this  
471 for longer treatment durations and younger age groups.

472

473

## 474 **5. Conclusions**

475 We conclude that patching the amblyopic eye is safe for adults as well as old children  
476 with amblyopia, and can result in recovery of visual acuity of the amblyopic eye and  
477 binocular visual functions.

478

479

## 480 **Data Availability**

481 All data concerning this study is available within the manuscript. Detailed data is available  
482 upon request to the first author.

483

## 484 **Conflicts of Interest**

485 The authors declare no competing interests.

486

487

## 488 **Funding Statement**

489 This work was supported by the National Natural Science Foundation of China grant  
490 NSFC 81500754, the Qianjiang Talent Project (QJD1702021), the Wenzhou Medical  
491 University grant QTJ16005 and a grant from the Ministry of Human Resources and  
492 Social Security, China to JZ, and Canadian Institutes of Health Research Grants CCI-

493 125686 and 228103, and an ERA-NET Neuron grant (JTC2015) to RFH. The sponsor  
494 or funding organization had no role in the design or conduct of this research.

495

496

497

## 498 **References**

- 499 1. De Buffon, C., *Dissertation sur la cause du strabisme ou des yeux louches*. Me. Acad Roy  
500 Sci 1743, Paris.
- 501 2. Pediatric Eye Disease Investigator Group Writing Committee, et al., *A randomized trial*  
502 *comparing Bangerter filters and patching for the treatment of moderate amblyopia in*  
503 *children*. *Ophthalmology*, 2010. **117**(5): p. 998-1004.
- 504 3. Group, T.P.E.D.I., *A randomized trial of atropine vs patching for treatment of moderate*  
505 *amblyopia in children*. *Arch Ophthalmol*, 2002. **120**: p. 268-277.
- 506 4. Repka, M.X., et al., *Atropine vs Patching for Treatment of Moderate Amblyopia Follow-*  
507 *up at 15 Years of Age of a Randomized Clinical Trial*. *JAMA Ophthalmol.* , 2014.
- 508 5. P.E.D.I.G., *randomized trial of treatment of amblyopia in children aged 7 to 17*. *Arch*  
509 *Ophthalmol*, 2005. **123**: p. 437-447.
- 510 6. Wallace, M.P., et al., *Compliance with occlusion therapy for childhood amblyopia*. *Invest*  
511 *Ophthalmol Vis Sci*, 2013. **54**(9): p. 6158-66.
- 512 7. Searle, A., et al., *psychosocial and clinical determinants of compliance with occlusion*  
513 *therapy for amblyopic children*. *Eye*, 2002. **16**(2): p. 150-155.
- 514 8. Birch, E.E., *Amblyopia and binocular vision*. *Prog Retin Eye Res*, 2013. **33**: p. 67-84.
- 515 9. Fronius, M., et al., *Efficiency of electronically monitored amblyopia treatment between 5*  
516 *and 16 years of age: New insight into declining susceptibility of the visual system*. *Vision*  
517 *Res*, 2014. **103**: p. 11-19.
- 518 10. Stewart, C.E., et al., *Treatment dose-response in amblyopia therapy: the Monitored*  
519 *Occlusion Treatment of Amblyopia Study (MOTAS)*. *Invest Ophthalmol Vis Sci*, 2004.  
520 **45**(9): p. 3048-54.
- 521 11. Holmes, J.M., et al., *Risk of amblyopia recurrence after cessation of treatment*. *J AAPOS*,  
522 2004. **8**(5): p. 420-8.
- 523 12. Bholra, R., et al., *Recurrence of amblyopia after occlusion therapy*. *Ophthalmology*, 2006.  
524 **113**(11): p. 2097-100.
- 525 13. Lunghi, C., D.C. Burr, and C. Morrone, *Brief periods of monocular deprivation disrupt*  
526 *ocular balance in human adult visual cortex*. *Current Biology*, 2011. **21**(14): p. R538-539.
- 527 14. Lunghi, C., et al., *Short-term monocular deprivation alters early components of visual*  
528 *evoked potentials*. *J Physiol*, 2015. **593**(19): p. 4361-72.

- 529 15. Lunghi, C., D.C. Burr, and M.C. Morrone, *Long-term effects of monocular deprivation*  
530 *revealed with binocular rivalry gratings modulated in luminance and in color.* J Vis, 2013.  
531 **13**(6).
- 532 16. Lunghi, C., et al., *Short-term monocular deprivation alters GABA in the adult human*  
533 *visual cortex.* Curr Biol, 2015. **25**(11): p. 1496-501.
- 534 17. Lunghi, C., et al., *Binocular Rivalry Measured 2 Hours After Occlusion Therapy Predicts*  
535 *the Recovery Rate of the Amblyopic Eye in Anisometropic Children.* Invest Ophthalmol  
536 Vis Sci, 2016. **57**(4): p. 1537-46.
- 537 18. Lunghi, C. and A. Sale, *A cycling lane for brain rewiring.* Current Biology, 2015. **25**(23): p.  
538 R1122-R1123.
- 539 19. Spiegel, D.P., A.S. Baldwin, and R.F. Hess, *Ocular dominance plasticity: inhibitory*  
540 *interactions and contrast equivalence.* Sci Rep, 2017. **7**: p. 39913.
- 541 20. Zhou, J., et al., *Short-term monocular patching boosts the patched eye's response in*  
542 *visual cortex.* Restor Neurol Neurosci, 2015. **33**(3): p. 381-7.
- 543 21. Zhou, J., S. Clavagnier, and R.F. Hess, *Short-term monocular deprivation strengthens the*  
544 *patched eye's contribution to binocular combination.* J Vis, 2013. **13**(5).
- 545 22. Zhou, J. and R.F. Hess, *Neutral-Density Filters Are Not a Patch on Occlusion.* Invest  
546 Ophthalmol Vis Sci, 2016. **57**(10): p. 4450-1.
- 547 23. Zhou, J., A. Reynaud, and R.F. Hess, *Aerobic Exercise Effects on Ocular Dominance*  
548 *Plasticity with a Phase Combination Task in Human Adults.* Neural Plast, 2017. **2017**: p.  
549 4780876.
- 550 24. Zhou, J., et al., *Chromatic and achromatic monocular deprivation produce separable*  
551 *changes of eye dominance in adults.* Proc Biol Sci, 2017. **284**(1867).
- 552 25. Zhou, J., B. Thompson, and R.F. Hess, *A new form rapid binocular plasticity in adult with*  
553 *amblyopia.* Scientific Reports, 2013. **3**(2638): p. 1-5.
- 554 26. Andree, G., *Der Einfluss der inversen Occlusion auf Fixation und Function amblyoper*  
555 *Augen.* Albrecht v Graefes Arch Ophthal 1966. **170**: p. 257-264.
- 556 27. Arruga, A., *Effect of occlusion of amblyopic eye on amblyopia and eccentric fixation.*  
557 Trans Ophthalmol Soc U K 1962. **82**: p. 45-50.
- 558 28. Cibis, L. and C. Windsor, *Clinical Results With Passive Amblyopia Treatment.* Amer  
559 Orthopt J 1967. **17**: p. 56-61.
- 560 29. Malik, J., A.K. Gupta, and D.K. Sen, *Red filter treatment in eccentric fixation.* Brit J  
561 Ophthal, 1968. **52**: p. 839-842.
- 562 30. von Noorden, G.K., *Occlusion therapy in amblyopia with eccentric fixation.* Arch  
563 Ophthal. , 1965. **73**: p. 776-781.
- 564 31. Oliver, M., Neumann, R., Chaimovitch, Y., Gotesman, N., & Shimshoni, M, *Compliance*  
565 *and results of treatment for amblyopia in children more than 8 years old.* American  
566 journal of ophthalmology, 1986. **102**(3): p. 340-345.
- 567 32. Pelli, D.G., *The VideoToolbox software for visual psychophysics: Transforming numbers*  
568 *into movies.* Spatial Vision, 1997. **10**(4): p. 437-442.
- 569 33. Brainard, D.H., *The Psychophysics Toolbox.* Spatial Vision, 1997. **10**(4): p. 433-436.
- 570 34. Ding, J. and G. Sperling, *A gain-control theory of binocular combination.* Proceedings of  
571 the National Academy of Sciences of the United States of America, 2006. **103**(4): p.  
572 1141-1146.

- 573 35. Huang, C.B., et al., *Binocular combination in anisometropic amblyopia*. Journal of Vision,  
574 2009. **9**(3): p. 17, 1-16.
- 575 36. Zhou, J., P.-C. Huang, and R.F. Hess, *Interocular suppression in amblyopia for global*  
576 *orientation processing*. Journal of Vision, 2013. **13**(5): p. 19, 1-14.
- 577 37. Zhou, J., et al., *The effect of unilateral mean luminance on binocular combination in*  
578 *normal and amblyopic vision*. Scientific reports, 2013. **3**: p. 2012, 1-7.
- 579 38. Manh, V.M., et al., *A Randomized Trial of a Binocular iPad Game Versus Part-Time*  
580 *Patching in Children Aged 13 to 16 Years With Amblyopia*. Am J Ophthalmol, 2018. **186**:  
581 p. 104-115.
- 582 39. Asper, L., K. Watt, and S. Khuu, *Optical treatment of amblyopia: a systematic review and*  
583 *meta-analysis*. Clin Exp Optom, 2018. **101**(4): p. 431-442.
- 584 40. Zhou, J., et al., *Amblyopic Suppression: Passive Attenuation, Enhanced Dichoptic*  
585 *Masking by the Fellow Eye or Reduced Dichoptic Masking by the Amblyopic Eye?* Invest  
586 Ophthalmol Vis Sci, 2018. **59**(10): p. 4190-4197.
- 587 41. Shooner, C., et al., *Population representation of visual information in areas V1 and V2 of*  
588 *amblyopic macaques*. Vision Res, 2015. **114**: p. 56-67.
- 589 42. Min, S.H., et al., *Ocular dominance plasticity in adults exhibits unusual dynamics*  
590 *. Scientific Reports, 2018. in submission.*
- 591 43. Bao, S., V.T. Chan, and M.M. Merzenich, *Cortical remodelling induced by activity of*  
592 *ventral tegmental dopamine neurons*. Nature, 2001. **412**(6842): p. 79-83.
- 593 44. Bear, M.F. and W. Singer, *Modulation of visual cortical plasticity by acetylcholine and*  
594 *noradrenaline*. Nature, 1986. **320**.
- 595 45. Maya Vetencourt, J.F., et al., *The antidepressant fluoxetine restores plasticity in the*  
596 *adult visual cortex*. Science, 2008. **320**(5874): p. 385-8.
- 597 46. Birch, E.E., et al., *Binocular iPad treatment for amblyopia in preschool children*. Journal  
598 of American Association for Pediatric Ophthalmology and Strabismus, 2014. **18**(4): p. e1-  
599 e2.
- 600 47. Kelly, K.R., et al., *Binocular iPad Game vs Patching for Treatment of Amblyopia in*  
601 *Children; A Randomized Clinical Trial*. JAMA Ophthalmology, 2016.
- 602 48. Li, J., et al., *Dichoptic training enables the adult amblyopic brain to learn*. Current  
603 Biology 2013. **23**: p. R308-R309.
- 604 49. Li, S.L., et al., *Dichoptic movie viewing treats childhood amblyopia*. J AAPOS 2015. **19**: p.  
605 401-405.
- 606 50. To, L., et al., *A game platform for treatment of amblyopia*. IEEE Transactions on Neural  
607 Systems & Rehabilitation Engineering, 2011. **19**(30): p. 280-289.
- 608 51. Pediatric Eye Disease Investigator, G., et al., *A randomized trial of increasing patching*  
609 *for amblyopia*. Ophthalmology, 2013. **120**(11): p. 2270-7.
- 610
